# Supplementary material for: Identification of a Candidate Rad1 Subunit for the Kinetoplastid 9-1-1 (Rad9-Hus1-Rad1) Complex
Source: MDPI journal article supplement (doi:10.3390/biology3040922), 2014-12-19
Supplement: s1 [file s1]

Supplementary Meterial

**Table S1.** UniProtKB accession numbers for 9-1-1 complex proteins and PCNA from four kinetoplastid organisms, humans and fission yeast.

|  | **9-1-1 Complex** | | | **PCNA** |
| --- | --- | --- | --- | --- |
| **Rad9** | **Hus1** | **Rad1** |
| *T. brucei* | Q38EW7 | Q581V9 | Q4GZB2 | Q38F34 |
| *T. cruzi* | Q4CVH1 | Q4DCF3 | Q4DWP1 | Q4CQ46 |
| *L. major* | Q4QF86 | Q4QBE5 | Q4QD01 | Q4QF35 |
| *A. deanei* | S9TXI3 | S9U8E7 | S9WEJ7 | S9X598 |
| *H. sapiens* | Q99638 | O60921 | O60671 | P12004 |
| *S. pombe* | P26306 | P78955 | P22193 | Q03392 |
